1 **A Genomic Reference Panel for *Drosophila serrata***

2

3

4 Adam R. Reddiex<sup>1</sup>, Scott, L. Allen<sup>1</sup>, Stephen F. Chenoweth<sup>1\*</sup>

5

6

7 1. School of Biological Sciences, The University of Queensland, QLD 4072,  
8 Australia.

9

10 \* correspondence: [s.chenoweth@uq.edu.au](mailto:s.chenoweth@uq.edu.au)

11

12

13

14

15 **Keywords:** *montium*, *gwas*, *population genetics*, *quantitative genetics*, *multi-*  
16 *parental population*

17

18

19 **Abstract**

20

21 Here we describe a collection of re-sequenced inbred lines of *Drosophila*  
22 *serrata*, sampled from a natural population situated deep within the species  
23 endemic distribution in Brisbane, Australia. *D. serrata* is a member of the  
24 speciose *montium* group whose members inhabit much of south east Asia and  
25 has been well studied for aspects of climatic adaptation, sexual selection, sexual  
26 dimorphism, and mate recognition. We sequenced 110 lines that were inbred via  
27 17-20 generations of full-sib mating at an average coverage of 23.5x with paired-  
28 end Illumina reads. 15,228,692 biallelic SNPs passed quality control after being  
29 called using the Joint Genotyper for Inbred Lines (JGIL). Inbreeding was highly  
30 effective and the average levels of residual heterozygosity (0.86%) were well  
31 below theoretical expectations. As expected, linkage disequilibrium decayed  
32 rapidly, with  $r^2$  dropping below 0.1 within 100 base pairs. With the exception of  
33 four closely related pairs of lines which may have been due to technical errors,  
34 there was no statistical support for population substructure. Consistent with  
35 other endemic populations of other *Drosophila* species, preliminary population  
36 genetic analyses revealed high nucleotide diversity and, on average, negative  
37 Tajima's D values. A preliminary GWAS was performed on a cuticular  
38 hydrocarbon trait, 2-MeC<sub>28</sub> revealing 4 SNPs passing Bonferroni significance  
39 residing in or near genes. One gene *Cht9* may be involved in the transport of  
40 CHCs from the site of production (oenocytes) to the cuticle. Our panel will  
41 facilitate broader population genomic and quantitative genetic studies of this  
42 species and serve as an important complement to existing *D.*  
43 *melanogaster* panels that can be used to test for the conservation of genetic  
44 architectures across the *Drosophila* genus.

45

46

47

## 48 **Introduction**

49

50 The availability of whole genome sequence data for *Drosophila* species has  
51 greatly facilitated advances in the fields of genetics and evolutionary biology.  
52 For example, the sequencing of 12 *Drosophila* genomes (Clark et al. 2007) was  
53 instrumental to new discoveries in comparative genomics (Stark et al. 2007;  
54 Sturgill et al. 2007; Zhang et al. 2007). The advent of affordable genome  
55 sequencing has also allowed population geneticists to characterise genomic  
56 variation within and among natural populations, improving our understanding of  
57 the complex evolutionary histories of cosmopolitan species such as *D.*  
58 *melanogaster* and *D. simulans* (Begun et al. 2007; Lack et al. 2015; Langley et al.  
59 2012; Pool et al. 2012). Most recently, multiple panels of re-sequenced inbred *D.*  
60 *melanogaster* lines have become available, facilitating the molecular dissection of  
61 complex trait variation (Grenier et al. 2015; Huang et al. 2014; King et al. 2012;  
62 Mackay et al. 2012). With these populations of reproducible genotypes,  
63 researchers have used genome-wide association analysis to identify genetic  
64 variants underlying variation in a broad range of traits including physiological  
65 traits (Burke et al. 2014; Dembeck et al. 2015; Gerken et al. 2015; Unckless et al.  
66 2015; Weber et al. 2012), behaviours (Shorter et al. 2015), recombination rates  
67 (Hunter et al. 2016), disease susceptibility (Magwire et al. 2012), and traits  
68 related to human health (Harbison et al. 2013; He et al. 2014; King et al. 2014;  
69 Kislukhin et al. 2013; Marriage et al. 2014).

70

71 Just as comparative genomic and population genetic studies of adaptation (e.g.  
72 Machado et al. 2016; Zhao et al. 2015) have been enhanced through the  
73 availability of multi-species genome resources, quantitative genetics may also  
74 benefit from the availability of multispecies genome panels. The development of  
75 panels of re-sequenced lines for *Drosophila* species beyond *D. melanogaster* may  
76 support broader lines of inquiry such as the conservation of genetic  
77 architectures among related taxa (Yassin et al. 2016). To this end, we have  
78 developed a new genomic resource for *D. serrata*, a member of the *montium*  
79 group of species. The *montium* group has long been regarded as a subgroup  
80 within the *melanogaster* species group (Lemeunier et al. 1986), but has more

81 recently been considered as a species group of its own (Da Lage et al. 2007;  
82 Yassin 2013). Although *montium* contains 98 species (Brake and Bachli 2008)  
83 and represents a significant fraction of all known *Drosophila* species, there have  
84 been very few genomic investigations of its members. Recently, genomic tools  
85 have been developed for *D. serrata* including an expressed sequence tag (EST)  
86 library (Frentiu et al. 2009), a physical linkage map (Stocker et al. 2012), and  
87 transcriptome-wide gene expression datasets (Allen et al. 2013; Allen et al.  
88 2017a; McGuigan et al. 2014). Additionally, an assembled and annotated genome  
89 sequence (Allen et al. 2017b) make *D. serrata* only the second species in the  
90 *montium* group with a sequenced genome after *D. kikkawai* (NCBI *Drosophila*  
91 *kikkawai* Annotation Release 101). Coupled to this, *D. serrata* is one member of  
92 the *montium* group that has been extensively studied in the field of evolutionary  
93 genetics.

94 Populations of *D. serrata* have been recorded from as far north as Rabaul, Papua  
95 New Guinea (4.4°N) (Ayala 1965) to as far south as Woolongong, Australia  
96 (34.3°S) (Jenkins and Hoffmann 1999). This broad latitudinal range has made *D.*  
97 *serrata* an ideal model for population studies addressing the evolution of species  
98 borders (Blows and Hoffmann 1993; Hallas et al. 2002; Magiafoglou et al. 2002;  
99 van Heerwaarden et al. 2009) and adaptation along latitudinal clines (Allen et al.  
100 2017a; Frentiu and Chenoweth 2010; Kellermann et al. 2009). *D. serrata* has also  
101 emerged as a powerful model for the application of quantitative genetic designs  
102 to investigate sexual selection (Gosden and Chenoweth 2014; Hine et al. 2002;  
103 McGuigan et al. 2011).

104 Here, we report development of a panel of 110 re-sequenced inbred *D.*  
105 *serrata* lines that we have called the *Drosophila serrata* Genome Reference Panel  
106 (DsGRP). Similar to the DGRP (Mackay et al. 2012), flies were sampled from a  
107 single large natural population with the exception that *D. serrata* was sampled  
108 from its endemic distribution. In this initial description, we estimate the degree  
109 of heterozygosity remaining in the lines after inbreeding, show the degree to  
110 which lines are genetically related to one another, estimate genome-wide levels  
111 of nucleotide diversity, and describe patterns of linkage disequilibrium. We also  
112 demonstrate how this panel of flies can be used to genetically dissect trait

113 variation by performing a genome-wide association analysis on variation in a  
114 cuticular hydrocarbon (CHC) trait.

115

## 116 **Methods:**

### 117 *Collection and inbreeding*

118 *Drosophila serrata* were collected from a wild population located at Bowman  
119 Park, Brisbane Australia (Latitude: -27.45922, Longitude: 152.97768) during  
120 October 2011. We established each line from a single, gravid female before  
121 applying 20 generations of inbreeding. Inbreeding was carried out each  
122 generation by pairing virgin brothers and sisters. 100 inbred lines, out of the  
123 initial 239 iso-female lines established, survived the full 20 generations  
124 inbreeding and a further 10 lines were established after 17 generations of  
125 inbreeding.

126

### 127 *Sequencing*

128 We sequenced the genomes of 110 inbred lines using 100 base-pair paired-end  
129 reads with a 500 base-pair insert on an Illumina Hiseq 2000 sequencing  
130 machine. Sequencing and library preparation were carried out by the Beijing  
131 Genomics Institute. DNA from each line was isolated from a pool of at least 30  
132 virgin female flies using a standard phenol-chloroform extraction method.

133

### 134 *Quality control and SNP calling*

135 We received reads from the Beijing Genomics Institute for which approximately  
136 95% of the bases from each line had a base quality score greater than or equal to  
137 20 (Illumina GA Pipeline v1.5). Read quality was also assessed using FastQC  
138 v0.11.2 before being mapped to the *Drosophila serrata* reference genome (Allen  
139 et al. 2017b) using BWA-mem v0.7.10 (Li 2013) and were realigned around  
140 indels using the GATK IndelRealigner v3.2-2 (McKenna et al. 2010). Genotypes  
141 for every line were inferred simultaneously using the Joint Genotyper for Inbred  
142 Lines (JGIL) v1.6 (Stone 2012). This probabilistic model was especially designed  
143 for genotyping large panels of inbred lines or strains and is considered to have  
144 high accuracy (Mackay et al. 2012; Stone 2012). Genotype calls with a  
145 probability lower than 99% were treated as missing genotypes.

146

147 *Residual heterozygosity*

148 The residual heterozygosity per line was estimated as the genome-wide  
149 proportion of sites that remained heterozygous after 17-20 generations of  
150 inbreeding, more specifically, we summed all of the genotype call that were  
151 heterozygous and expressed this statistic as a percentage of all genotyped sites.  
152 In addition, for each site in the genome that differed among the inbred lines, we  
153 calculated the percentage of lines that were heterozygous for that site. Site  
154 filtering based on minor allele frequency and coverage was not performed for  
155 this analysis.

156

157 *Pairwise relatedness between lines*

158 Pairwise relatedness between lines ( $j$  and  $k$ ) was estimated using the --make-  
159 grm-inbred command of GCTA v1.24.2 (Yang et al. 2011), which applies the  
160 expression:

161

$$162 \quad A_{jk} = \frac{1}{N} \sum_{i=1}^N \frac{(\chi_{ij} - 2p_i)(\chi_{ik} - 2p_i)}{2p_i(1 - p_i)} \quad [1]$$

163

164 where,  $\chi_{ij}$  is the number of copies of the reference allele for the  $i^{\text{th}}$  SNP for  
165 individual  $j$  and  $p$  is the population allele frequency.  $N$  is the total number SNPs.  
166 Only biallelic SNPs with a read depth between 5 and 60 and a minor allele  
167 frequency above 5% were used to estimate relatedness.

168

169 *Estimating population substructure*

170

171 To test whether the sample of lines exhibited any underlying substructure, we  
172 used the approach of Bryc et al. (2013) which is founded on random matrix  
173 theory. Importantly, while the genomic relatedness matrix calculated in GCTA,  $\mathbf{A}$   
174 =  $\mathbf{W}\mathbf{W}'/N$ , is normalised with element  $W_{ij} = (\chi_{ij} - 2p_i)/\sqrt{2p_i(1 - p_i)}$ , where  $\chi_{ij}$   
175 is the number copies of the minor allele carried by individual  $j$  (Yang et al. 2011)  
176 and  $p_i$  is the population allele frequency, the genomic relatedness matrix used by  
177 the approach of Bryc et al. (2013) is not. For this approach, the genomic

178 relatedness matrix,  $\mathbf{X} = \mathbf{C}\mathbf{C}'$ , where  $\mathbf{C}$  is an  $M \times N$  rectangular matrix with  $M$   
179 corresponding to the number of individuals used to estimate  $\mathbf{X}$  and  $N$  is the  
180 number of SNPs, here the element  $C_{ij} = \chi_{ij}$ , the number of copies of the minor  
181 allele carried by individual  $j$ .  $\mathbf{X}$  was scaled by equation 2.8 in Bryc et al. (2013)  
182 using values of  $M=110$  and  $N=3,709,328$ . Only SNPs without missing data were  
183 used for this analysis. The number of sub-populations was determined by the  
184 number of eigenvalues larger than that expected for a random relatedness  
185 matrix given the significance threshold  $t = (1 + F) / 2$  (Bryc et al. 2013). Here,  $t$   
186 corresponds to a value of 0.993 with our expected inbreeding coefficient ( $F$ ) of  
187 0.986 (Falconer and Mackay 1996) after 20 generations of full-sib mating. Upon  
188 seeing that a small number of lines were unusually highly related (see results),  
189 we repeated this analysis after removing four lines (line IDs: 29, 134, 159, 206)  
190 to verify that the significant results were driven only by these “outliers”.

191

#### 192 *Linkage disequilibrium*

193 We estimated linkage disequilibrium as the square of the inter-variant allele  
194 count correlation ( $r^2$ ) using PLINK v1.9 (Chang et al. 2015). We estimated  $r^2$  in  
195 non-overlapping 500 base-pair windows across the entire genome. The analysis  
196 was performed on biallelic SNPs that had an average read depth of between 5  
197 and 60 and a minimum minor allele frequency of 5%. The four highly related  
198 lines ( $r \geq 0.1$ ) were removed prior to the analysis.

199

#### 200 *Nucleotide diversity and neutrality*

201 We estimated nucleotide diversity ( $\pi$ ) and Tajima’s  $D$  (Tajima 1989) statistic in  
202 50 kilobase non-overlapping sliding windows and took the mean for each of the  
203 major chromosome arms (2L, 2R, 3L, 3R, and X) using vcftools v0.1.15 (Danecek  
204 et al. 2011). The SNP data used for this analysis had an average read depth  
205 across all lines of between 5 and 60 but no threshold on minor allele frequency  
206 was applied. Again, the four highly related lines were removed prior to this  
207 analysis.

208

#### 209 *Genome-wide association of female CHC expression*

210



211 As proof-of-concept we performed a GWAS on a single cuticular hydrocarbon, 2-  
212 methyltacosane, (2-Me-C<sub>28</sub>). CHCs are waxy substances that are secreted on  
213 the cuticle with 2-Me-C<sub>28</sub> being one of a suite of CHCs that have been extensively  
214 studied in this species due to their role in species recognition, mate choice, and  
215 desiccation resistance. For each of 94 lines, we extracted CHCs from four virgin  
216 females, across two replicate vials using individual whole-body washes in 100µl  
217 of the solvent hexane. We used a standard gas chromatography method to  
218 quantify the amount of 2-Me-C<sub>28</sub> (Blows and Allan 1998). To maintain the trait  
219 scale used in previous studies, we transformed the amount of 2-Me-C<sub>28</sub> into a  
220 log-contrast value following Aitchison (1986), using an additional trait, the CHC  
221 9-hexacosane, 9-C<sub>26:1</sub>, as the divisor. This transformation turns the expression of  
222 CHCs into a proportional measure and provides an internal control for other  
223 sources of variation including body size and condition.

224

225 Our GWAS contrasts with other analyses performed on the DGRP in that we  
226 model trait variation at the individual, rather than line mean level. We applied a  
227 single marker mixed effects association analysis, where the following model was  
228 fit for every biallelic SNP that had mean coverage between 5 and 60 and sample  
229 MAF of 5%:

230

$$231 \quad y_{i,j} = \mu + \text{snp} + G_i + \varepsilon_{i,j} \quad (i = 1, \dots, 94 \quad j = 1, \dots, 4) \quad [2]$$

232

233 Here, CHC expression ( $y$ ) of replicate individual  $j$  on genotype  $i$  is modelled as a  
234 function of the mean term ( $\mu$ ), the additive fixed effect of the candidate SNP, the  
235 polygenic random effect that is captured by the genomic relatedness matrix ( $\mathbf{G}$ )  
236 where  $\mathbf{G}$  has a  $\sim N(0, \sigma_A^2 \mathbf{A})$  distribution, and the residual error ( $\varepsilon$ ). This model  
237 was specifically designed for populations where identical genotypes can be  
238 measured independently in multiple organisms such as inbred lines (Kruijer et  
239 al. 2015) and was fit using AsReml-R v3 (VSN International) for a total of  
240 3,318,503 SNPs. There are a couple of differences between the approach outlined  
241 above and other mixed modelling approaches to GWAS implemented in  
242 programs such as GEMMA (Zhou and Stephens 2012), FaST-LMM (Lippert et al.  
243 2011), and GCTA (Yang et al. 2011). First, the use of individual-level opposed to



244 line mean level observations, allows for estimation of the genomic heritability  
245 (Kruijer et al. 2015). Although mapping power is unlikely to be significantly  
246 boosted through the use of individual level data *per se* when working with inbred  
247 lines (Kruijer et al. 2015), a second aspect to our approach does potentially  
248 increase power. Our, albeit slower, approach re-estimates the polygenic variance  
249 component when each SNP tested and results in an exact calculation of Wald's  
250 test statistic (Zhou and Stephens 2012). This contrasts with the approach used  
251 by many mixed model GWAS programs where, to save computation time, this  
252 variance component is estimated once in a null model with no fixed effect of SNP  
253 and then held constant for each SNP tested. Such an approach produces an  
254 approximate value of the test statistic which can result in power loss under some  
255 circumstances (Zhou and Stephens 2012). As these circumstances are difficult to  
256 predict beforehand, we chose to re-estimate the polygenic random effect despite  
257 the computational cost.

258

259 To increase computational speed, we nested this linear model within an R loop  
260 that allows the access of multiple cores using the “foreach” and “doMC” packages  
261 (Revolution Analytics and Steve Weston 2015). Significant SNPs were identified  
262 as those with p-values that passed Bonferroni multiple test correction  $-\log_{10}(p)$   
263  $> 7.8$ , we also report SNPs with  $-\log_{10}(p) > 5$  for comparison to other *Drosophila*  
264 GWAS where this arbitrary threshold value is used (Mackay et al. 2012). We took  
265 statistically significant SNPs and annotated them to the current version of the *D.*  
266 *serrata* genome (Allen et al. 2017b). If a significant SNP was located within a  
267 gene, we blasted the *D. serrata* gene sequence to the *D. melanogaster* genome to  
268 determine gene orthology using Flybase (Attrill et al. 2016).

269

## 270 **Data Availability Statement**

271

272 Raw reads for all sequenced lines are available from the NCBI short read archive  
273 under Bioproject ID: PRJNA419238. The genomic relatedness matrices used in  
274 the population structure analysis are provided in supplementary files  
275 (grm\_full\_Bryc.txt, grm\_reduced\_Bryc.txt, grm\_full\_gcta.txt, and  
276 grm\_reduced\_gcta.txt). We have provided the R code, Bryc.R, that implements the

277 test for large eigenvalues (Bryc et al. 2011). The SNP list used to analyse the data  
278 in this study is available from Dryad ( doi:XXXXYY) and also from  
279 [www.chenowethlab.org/resources](http://www.chenowethlab.org/resources)). The CHC phenotype file is provided as the  
280 supplementary file pheno.txt. The linear model used to fit the GWAS in  
281 ASREML/R model is provided in the file asreml\_gwas.R.

282

## 283 **Results and Discussion:**

284

### 285 *Identification of SNPs*

286 We established a panel of 110 inbred lines of *Drosophila serrata* from wild  
287 females caught from a single population in Brisbane Australia and sequenced  
288 their genomes. 100 base-pair paired-end reads were mapped to the *Drosophila*  
289 *serrata* reference genome (Allen et al. 2017b) with a mean coverage of  $23.5 \pm 0.5$   
290 reads per line. Using the Joint Genotyper for Inbred Lines (Stone 2012), we  
291 identified 15,228,692 biallelic single nucleotide polymorphisms (SNPs) applying  
292 a 99% probability threshold. 13,959,239 of these SNPs had a median coverage  
293 between 5 and 60 in which over 80% of the lines were genotyped for that  
294 variant. Most SNPs segregate at low frequencies (Fig. 1) with 6,090,058  
295 instances of singletons, where a SNP was present in only one line. The majority  
296 (62%) of the SNPs were annotated to intergenic regions of the genome while  
297 12% of SNPs annotated to exonic regions and 26% were found to be in introns.  
298 A total of 3,709,329 SNPs met the minimum allele frequency threshold (MAF) of  
299 5% to be used for genome-wide association analysis and the estimation of  
300 relatedness between lines.

301

### 302 *Residual heterozygosity*

303 Despite the application of inbreeding for many generations, inbred *Drosophila*  
304 lines often contain regions of residual heterozygosity (King et al. 2012; Lack et al.  
305 2015; Mackay et al. 2012; Nuzhdin et al. 1997). After 17-20 generations of  
306 inbreeding, residual heterozygosity in our lines was very low and we observed  
307 only a small proportion of segregating sites within lines, suggesting that  
308 inbreeding had successfully fixed variation across these genomes. Of the 110  
309 inbred lines, 104 had fewer than 2% segregating SNPs and 82 lines had less than

310 1% segregating SNPs (Fig. 2). Across lines, the average proportion of segregating  
311 SNPs was  $0.86\% \pm 0.11\%$ , less than the theoretical expectation of 1.4% for lines  
312 that have experienced 20 generations of full-sib mating which corresponds to an  
313 expected inbreeding coefficient of  $F = 0.986$  (Falconer and Mackay 1996). This  
314 slightly lower than expected level of residual heterozygosity may simply reflect  
315 sampling variation, be due to SNPs on the X chromosome, or may indicate  
316 purging of partially deleterious alleles during the inbreeding process (Garcia-  
317 Dorado 2008; Garcia-Dorado 2012). There was no detectable difference in the  
318 fraction of heterozygous SNPs between the lines inbred for 17 and 20  
319 generations (ANOVA:  $F_{1,108} = 0.0944$ ,  $P = 0.76$ ). This result suggests that 17  
320 generations of inbreeding may be sufficient for future line development.

321

322 Although there are several mechanisms that can inhibit the fixation of an allele  
323 within an inbred line, when short-read re-sequencing technology is used for  
324 genotyping, loci can falsely appear to be segregating due to the presence of  
325 paralogous genes or other repetitive DNA sequences (Treangen and Salzberg  
326 2012). If paralogous genes are not represented in the reference genome, DNA  
327 sequences from the original gene and a divergent duplicate gene are mapped to  
328 the same region of the genome, causing the appearance of segregating loci in the  
329 population. When this phenomenon occurs, it is expected that regions of the  
330 genome with high “apparent heterozygosity” will associate with a higher read  
331 depth than the genome-wide average. Across the genome we found a weak,  
332 positive correlation between the level of residual heterozygosity and read depth  
333 (Spearman’s  $\rho = 0.036$ ,  $p = 2.2 \times 10^{-16}$ ). Plots of these two factors however,  
334 clearly show an alignment of regions with both high levels of residual  
335 heterozygosity and read depth, suggesting that the *D. serrata* reference genome  
336 could be missing some duplications (Fig. 3). Alternatively, this result could be  
337 due to copy number variation among the re-sequenced lines and/or between the  
338 reference genome and the 110 lines. We hope that further work and  
339 improvement of our genome for this species will elucidate these small regions of  
340 residual heterozygosity.

341

342 *Relatedness between lines*

343 Population structure and cryptic relatedness are well known to confound genetic  
344 association studies, potentially generating false positive genotype-phenotype  
345 associations (Kittles et al. 2002; Knowler et al. 1988). Conceptually, these  
346 confounding factors can be described as the unobserved pedigree of the sampled  
347 individuals caused by distant relationships (Astle and Balding 2009). The  
348 sources of these relationships are varied but include population admixture,  
349 inadvertent sampling of close relatives, and the presence of shared chromosomal  
350 inversions. Fortunately, the unobserved pedigree can be estimated using marker  
351 based approaches. Here we used such an approach to estimate the pairwise  
352 relatedness between all lines in the form of a genomic relatedness matrix.

353

354 The structure of the genomic relatedness matrix shows that the majority of the  
355 DsGRP lines are unrelated as would be expected of a sample from a large,  
356 randomly mating population (Fig. 4). We found a pair of lines that were 100%  
357 related to one another, most likely due to contamination either during the  
358 inbreeding process or DNA extraction and subsequent library preparation.  
359 Generally however, this panel of flies exhibits a lower level of relatedness  
360 compared to the DGRP, where 2.7% of the 20,910 possible pairs of lines had  
361 estimates of pairwise relatedness over 0.05 (Huang et al. 2014) compared to  
362 0.08% of 5,995 pairs of lines reported here. The discrepancy between the levels  
363 of relatedness between the DsGRP and DGRP is potentially due to the different  
364 demographic histories of the founding populations that generate population  
365 structure. North American populations of *D. melanogaster* have relatively  
366 complex demographic histories with admixture of African and European  
367 ancestors and instances of secondary contact (Pool et al. 2012) compared to the  
368 endemic population of *D. serrata*.

369

370 Another likely explanation for the increased levels of relatedness in the DGRP is  
371 the presence of common segregating inversions. While chromosomal inversions  
372 are known to segregate in *D. serrata*, their frequency and number tends to  
373 increase in populations approaching the equator (Stocker et al. 2004).  
374 Therefore, it may be the case that founding the DsGRP from the higher latitude of  
375 Brisbane has resulted in sampling relatively few inversions. As of yet, these lines

376 have not been karyotyped; however the low levels of relatedness and the lack of  
377 any bimodal distribution for residual heterozygosity, such as the one found in the  
378 DGRP (Huang et al. 2014), where a portion of the lines had high levels of  
379 segregating SNP loci (15-20%), suggests that segregating inversions are  
380 negligible in this population.

381

382 We performed an eigendecomposition of the genomic relatedness matrix to test  
383 for the presence of population structure using the approach outlined in Bryc et  
384 al. (2013). This analysis revealed two large eigenvalues ( $\lambda_1 = 20.08$  and  $\lambda_2 =$   
385  $1.12$ ) that were greater than that expected for a random relatedness matrix of  
386 equal size (Threshold = 0.993) (Fig. 5). There is therefore evidence that the full  
387 set of 110 of lines contain substructure in the form of two subpopulations. We  
388 reasoned that the second large eigenvalue was likely caused by the four pairs of  
389 lines that were highly related to each other ( $A_{jk} = 0.29, 0.38, 0.39,$  and  $1.04$ ; Fig.  
390 4). To test this, we repeated the analysis after randomly removing one line from  
391 each of the four pairs of closely related lines. Confirming the prediction, there  
392 was only one significantly large eigenvalue in this second analysis ( $\lambda_1 = 19.66$ ).  
393 Such a result is expected when the data includes only a single population. To  
394 summarise, after the four highly-related lines have been removed, there is no  
395 clear evidence for population structure in the DsGRP that would lead to spurious  
396 genotype-phenotype associations in genome-wide association analysis.

397

### 398 *Linkage Disequilibrium*

399 The rapid decay of linkage disequilibrium with genomic distance is a common  
400 feature of *Drosophila* species with  $r^2$  dropping below 0.1 within 100 base pairs  
401 (Long et al. 1998; Mackay et al. 2012). This allows for higher resolution mapping  
402 compared to other species such as maize and humans in which the equivalent  
403 decay does not occur until after approximately 2000 base pairs (Remington et al.  
404 2001) and 50,000 base pairs (Koch et al. 2013), respectively. In the DsGRP,  
405 linkage disequilibrium decays rapidly with  $r^2$ , on average, dropping below 0.1  
406 after 75 base pairs. Surprisingly, we observe faster decay on the X chromosome  
407 compared to the autosomes (Fig. 6), contrary to Mackay et al. (2012), despite the

408 fact that the X chromosome has a smaller effective population size than the  
409 autosomes.

410

#### 411 *Nucleotide diversity and neutrality*

412 For the two cosmopolitan species of *Drosophila* that have been studied  
413 extensively, *D. melanogaster* and *D. simulans*, the ancestral populations from  
414 Africa consistently exhibit higher levels of polymorphism compared to the  
415 derived populations from America and Europe (Andolfatto 2001; Baudry et al.  
416 2004; Begun and Aquadro 1993; Grenier et al. 2015; Lack et al. 2015).  
417 Presumably, nucleotide diversity is reduced during bottleneck events associated  
418 with the colonisation of new habitat. The relatively high estimates of nucleotide  
419 diversity for *D. mauritiana*, an endemic species from Mauritius, bolster this trend  
420 (Garrigan et al. 2014). We therefore expected that our population of *D. serrata*,  
421 founded from the species' ancestral range, would exhibit relatively high levels of  
422 nucleotide diversity. We estimated nucleotide diversity ( $\pi$ ) along the major  
423 chromosome arms 2L, 2R, 3L, 3R, and X using a 50 kilobase non-overlapping  
424 sliding window approach (Table 1, Fig. 7). Averaged across the genome, we  
425 estimated that  $\pi = 0.0079$ , which is consistent with the pattern seen in other  
426 species of relatively increased levels of nucleotide diversity for populations from  
427 ancestral ranges compared to more recently established population outside of  
428 the ancestral range (Andolfatto 2001; Baudry et al. 2004; Begun and Aquadro  
429 1993; Grenier et al. 2015; Lack et al. 2015).

430

431 Using the same sliding window approach, we tested for departures from  
432 neutrality using Tajima's D (Table 1, Fig. 7) (Tajima 1989). As with other  
433 populations of *Drosophila*, the DGRP (Mackay et al. 2012), the Zimbabwean  
434 population in the Global Diversity Lines (Grenier et al. 2015), and *D. mauritiana*  
435 (Garrigan et al. 2014), Tajima's D was negative across the entire genome  
436 (Tajima's D = -1.27). This is consistent with an abundance of rare alleles and  
437 could be indicative of population expansion or the occurrence of selective  
438 sweeps, however this statistic cannot distinguish the effects of demography from  
439 selection. In the DsGRP, chromosome arm 2L has higher estimates of Tajima's D  
440 compared to the other chromosome arms (Fig. 7). The causes for this pattern



441 will hopefully be resolved through a more in-depth population genomic analysis,  
442 as chromosome 2L may potentially harbour more genomic regions that  
443 experience balancing selection, which would increase the average value of  
444 Tajima's D.

445

#### 446 *Genome-wide association analysis of female CHC expression*

447 A major motivation for developing the DsGRP was to begin connecting molecular  
448 variation with standing variation for some of the well-studied quantitative traits  
449 of *D. serrata*. Here, we applied genome-wide association analysis to the  
450 expression of the CHC 2-Me-C<sub>28</sub> in females and identify new candidate genes that  
451 might influence trait variation. Using our mixed model approach, we found 4  
452 SNPs that passed the 0.05 significance threshold after Bonferroni multiple test  
453 correction (Figure 8). Two of the SNPs are situated within genes, while the other  
454 two lie within 3kb of genes. We found a further 189 SNPs with p-values lower  
455 than a suggestive threshold of 10<sup>-5</sup>.

456

457 We note that a GWAS performed on line mean data using the GCTA program  
458 (Yang et al. 2011), which like many other mixed model GWAS applications,  
459 estimates the polygenic variance only once, detected no SNPs above Bonferroni  
460 threshold and only 34 under the arbitrary threshold of 10<sup>-5</sup>. We also applied our  
461 ASREML approach to line means rather than individuals and found that it  
462 detected exactly the same 4 SNPs above Bonferroni as our approach in eq. 2 (190  
463 SNPs had p-values lower than 10<sup>-5</sup>). It therefore appears that the increase in  
464 detection rate is in this case mainly due to the ASREML model re-estimating the  
465 polygenic variance for each SNP tested which results in an exact, rather than  
466 approximate, calculation of the test statistic (Zhou and Stephens 2012).

467 The majority of the literature regarding the expression of CHCs has identified  
468 genes that are related to their production within specialised cells, oenocytes.  
469 These genes constitute the major biosynthetic pathway known for CHC  
470 production and are involved with fatty-acid synthesis, elongation, desaturation,  
471 and reduction (Chertemps et al. 2007; Chertemps et al. 2006; Chung et al. 2014;  
472 Fang et al. 2009; Labeur et al. 2002; Marcillac et al. 2005; Wicker-Thomas et al.



473 2015). Although none of the genes associated with the statistically significant  
474 SNPs found in this study are involved in this biosynthetic pathway, there are  
475 other biological processes involved with CHC expression, as measured by hexane  
476 washes from the cuticle. How CHCs are transported from the oenocytes to the  
477 cuticle is unknown, this study provides a potential candidate gene involved in  
478 this process. One of the significant SNPs resides in the gene *Cht9*, a *chitinase*  
479 found on chromosome 2R. *Cht9*, along with a number of other *chitinases* and  
480 *imaginal-disc-growth-factors* are important for the development of epithelial  
481 apical extracellular matrix, which controls the development and maintenance of  
482 wound healing, cell signalling, and organ morphogenesis in *Drosophila* (Galko  
483 and Krasnow 2004; Turner 2009). Knocking out the expression of *Cht9* with  
484 RNAi leads to deformed cuticles, inability to heal wounds, and defects in larval  
485 and adult molting (Pesch et al. 2016), and here, we provide evidence that  
486 variation in this gene may also influence other cuticular traits such as CHC  
487 abundance. Notwithstanding the small number of lines, the genome-wide  
488 association analysis presented here, combined with a previous study that  
489 identified the major role of the transcription factor *POU domain motif 3 (pdm3)*  
490 for polymorphic female-limited abdominal pigmentation (Yassin et al. 2016),  
491 illustrate the potential of the DsGRP to discover novel regions of the genome that  
492 underpin the genetic architecture of traits.

493

## 494 **Conclusion**

495 We have assembled a new resource for the study of quantitative traits and  
496 population genomic variation in a non-model *Drosophila* species within its  
497 endemic distribution. These reproducible genotypes sampled from a single  
498 population not only provide a rich genomic dataset suitable for population  
499 genomic studies, but also provide a critical resource for the discovery of genetic  
500 variants underlying ecologically important quantitative traits. We hope that the  
501 DsGRP will provide a useful complement to other *Drosophila* resources such as  
502 the DGRP (Mackay et al. 2012), the DSPR (King et al. 2012), and the *Drosophila*  
503 Genome Nexus (Lack et al. 2015).

504

505 In this first characterisation of the DsGRP at the genomic level, we have shown  
506 that the inbreeding process has been successful in homogenising the majority of  
507 the genome of each of the lines. Through the estimation of the genomic  
508 relatedness matrix we have shown that the DsGRP represents a random sample  
509 from a large population that contains very low levels of cryptic relatedness.  
510 These characteristics, along with rapid decay of linkage disequilibrium, make the  
511 DsGRP an ideal resource for the application of genome-wide association analysis  
512 and for generating new multifounder QTL mapping populations that will boost  
513 mapping power.

514

### 515 **Acknowledgements**

516 We thank EK Delaney for comments on the manuscript and NC Appleton for  
517 assistance in the laboratory. This work was supported by an Australian  
518 Postgraduate Award to ARR and funds from the Australian Research Council and  
519 The University of Queensland awarded to SFC.

520

### 521 **References:**

- 522 Aitchison, J. 1986, The statistical analysis of compositional data. London,  
523 Chapman & Hall.
- 524 Allen, S. L., R. Bonduriansky, and S. F. Chenoweth. 2013. The genomic distribution  
525 of sex-biased genes in *Drosophila serrata*: X chromosome  
526 demasculinization, feminization, and hyperexpression in both sexes.  
527 *Genome Biology and Evolution* 5:1986-1994.
- 528 Allen, S. L., R. Bonduriansky, C. M. Sgro, and S. F. Chenoweth. 2017a. Sex-biased  
529 transcriptome divergence along a latitudinal gradient. *Molecular Ecology*  
530 26:1256-1272.
- 531 Allen, S. L., E. K. Delaney, A. Kopp, and S. F. Chenoweth. 2017b. Single-molecule  
532 sequencing of the *Drosophila serrata* genome. *G3-Genes Genomes*  
533 7:781-788.
- 534 Andolfatto, P. 2001. Contrasting patterns of X-linked and autosomal nucleotide  
535 variation in *Drosophila melanogaster* and *Drosophila simulans*. *Molecular*  
536 *Biology and Evolution* 18:279-290.
- 537 Astle, W., and D. J. Balding. 2009. Population structure and cryptic relatedness in  
538 genetic association studies. *Statistical Science* 24:451-471.
- 539 Attrill, H., K. Falls, J. L. Goodman, G. H. Millburn, G. Antonazzo, A. J. Rey, S. J.  
540 Marygold et al. 2016. FlyBase: establishing a Gene Group resource for  
541 *Drosophila melanogaster*. *Nucleic Acids Research* 44:D786-D792.
- 542 Ayala, F. J. 1965. Sibling Species of the *Drosophila serrata* group *Evolution*  
543 19:538-545.

- 544 Baudry, E., B. Viginier, and M. Veuille. 2004. Non-African populations of  
545 *Drosophila melanogaster* have a unique origin. *Molecular Biology and*  
546 *Evolution* 21:1482-1491.
- 547 Begun, D. J., and C. F. Aquadro. 1993. African and North American populations of  
548 *Drosophila melanogaster* are very different at the DNA level. *Nature*  
549 365:548-550.
- 550 Begun, D. J., A. K. Holloway, K. Stevens, L. W. Hillier, Y. P. Poh, M. W. Hahn, P. M.  
551 Nista et al. 2007. Population genomics: Whole-genome analysis of  
552 polymorphism and divergence in *Drosophila simulans*. *Plos Biology*  
553 5:2534-2559.
- 554 Blows, M. W., and R. A. Allan. 1998. Levels of mate recognition within and  
555 between two *Drosophila* species and their hybrids. *American Naturalist*  
556 152:826-837.
- 557 Blows, M. W., and A. A. Hoffmann. 1993. The genetics of central and marginal  
558 populations of *Drosophila serrata* .1. Genetic variation for stress  
559 resistance and species borders. *Evolution* 47:1255-1270.
- 560 Brake, I., and G. Bachli. 2008, *World Catalogue of Insects, Volume 9: Dro-*  
561 *sophilidae (Diptera)*. Stenstrup, Denmark, Apollo Books.
- 562 Bryc, K., W. Bryc, and J. W. Silverstein. 2013. Separation of the largest eigenvalues  
563 in eigenanalysis of genotype data from discrete subpopulations.  
564 *Theoretical Population Biology* 89:34-43.
- 565 Burke, M. K., E. G. King, P. Shahrestani, M. R. Rose, and A. D. Long. 2014. Genome-  
566 wide association study of extreme longevity in *Drosophila melanogaster*.  
567 *Genome Biology and Evolution* 6:1-11.
- 568 Chang, C. C., C. C. Chow, L. Tellier, S. Vattikuti, S. M. Purcell, and J. J. Lee. 2015.  
569 Second-generation PLINK: rising to the challenge of larger and richer  
570 datasets. *Gigascience* 4.
- 571 Chertemps, T., L. Duportets, C. Labeur, R. Ueda, K. Takahashi, K. Saigo, and C.  
572 Wicker-Thomas. 2007. A female-biased expressed elongase involved in  
573 long-chain hydrocarbon biosynthesis and courtship behavior in  
574 *Drosophila melanogaster*. *Proceedings of the National Academy of*  
575 *Sciences of the United States of America* 104:4273-4278.
- 576 Chertemps, T., L. Duportets, C. Labeur, M. Ueyama, and C. Wicker-Thomas. 2006.  
577 A female-specific desaturase gene responsible for diene hydrocarbon  
578 biosynthesis and courtship behaviour in *Drosophila melanogaster*. *Insect*  
579 *Molecular Biology* 15:465-473.
- 580 Chung, H., D. W. Loehlin, H. D. Dufour, K. Vaccarro, J. G. Millar, and S. B. Carroll.  
581 2014. A single gene affects both ecological divergence and mate choice in  
582 *Drosophila*. *Science* 343:1148-1151.
- 583 Clark, A. G., M. B. Eisen, D. R. Smith, C. M. Bergman, B. Oliver, T. A. Markow, T. C.  
584 Kaufman et al. 2007. Evolution of genes and genomes on the *Drosophila*  
585 phylogeny. *Nature* 450:203-218.
- 586 Da Lage, J. L., G. J. Kergoat, F. Maczkowiak, J. F. Silvain, M. L. Cariou, and D.  
587 Lachaise. 2007. A phylogeny of *Drosophilidae* using the *Amyrel* gene:  
588 questioning the *Drosophila melanogaster* species group boundaries.  
589 *Journal of Zoological Systematics and Evolutionary Research* 45:47-63.
- 590 Danecek, P., A. Auton, G. Abecasis, C. A. Albers, E. Banks, M. A. DePristo, R. E.  
591 Handsaker et al. 2011. The variant call format and VCFtools.  
592 *Bioinformatics* 27:2156-2158.

- 593 Dembeck, L. M., W. Huang, M. M. Magwire, F. Lawrence, R. F. Lyman, and T. F. C.  
594 Mackay. 2015. Genetic architecture of abdominal pigmentation in  
595 *Drosophila melanogaster*. Plos Genetics 11.
- 596 Falconer, D. S., and T. F. C. Mackay. 1996, Introduction to Quantitative Genetics.  
597 Burnt Mill, England, Longman.
- 598 Fang, S., C. T. Ting, C. R. Lee, K. H. Chu, C. C. Wang, and S. C. Tsauro. 2009.  
599 Molecular evolution and functional diversification of fatty acid  
600 desaturases after recurrent gene duplication in *Drosophila*. Molecular  
601 Biology and Evolution 26:1447-1456.
- 602 Frentiu, F. D., M. Adamski, E. A. McGraw, M. W. Blows, and S. F. Chenoweth. 2009.  
603 An expressed sequence tag (EST) library for *Drosophila serrata*, a model  
604 system for sexual selection and climatic adaptation studies. BMC  
605 Genomics 10.
- 606 Frentiu, F. D., and S. F. Chenoweth. 2010. Clines in cuticular hydrocarbons in two  
607 *Drosophila* species with independent population histories. Evolution  
608 64:1784-1794.
- 609 Galko, M. J., and M. A. Krasnow. 2004. Cellular and genetic analysis of wound  
610 healing in *Drosophila* larvae. Plos Biology 2:1114-1126.
- 611 Garcia-Dorado, A. 2008. A simple method to account for natural selection when  
612 predicting inbreeding depression. Genetics 180:1559-1566.
- 613 —. 2012. Understanding and predicting the fitness decline of shrunk  
614 populations: inbreeding, purging, mutation, and standard selection.  
615 Genetics 190:1461-1476.
- 616 Garrigan, D., S. B. Kingan, A. J. Geneva, J. P. Vedanayagam, and D. C. Presgraves.  
617 2014. Genome diversity and divergence in *Drosophila mauritiana*:  
618 multiple signatures of faster X evolution. Genome Biology and Evolution  
619 6:2444-2458.
- 620 Gerken, A. R., O. C. Eller, D. A. Hahn, and T. J. Morgan. 2015. Constraints,  
621 independence, and evolution of thermal plasticity: probing genetic  
622 architecture of long- and short-term thermal acclimation. Proceedings of  
623 the National Academy of Sciences of the United States of America  
624 112:4399-4404.
- 625 Gosden, T. P., and S. F. Chenoweth. 2014. The evolutionary stability of cross-sex,  
626 cross-trait genetic covariances. Evolution 68:1687-1697.
- 627 Grenier, J. K., J. R. Arguello, M. C. Moreira, S. Gottipati, J. Mohammed, S. R. Hackett,  
628 R. Boughton et al. 2015. Global Diversity Lines-A Five-Continent  
629 Reference Panel of Sequenced *Drosophila melanogaster* Strains. G3-Genes  
630 Genomes Genetics 5:593-603.
- 631 Hallas, R., M. Schiffer, and A. A. Hoffmann. 2002. Clinal variation in *Drosophila*  
632 *serrata* for stress resistance and body size. Genetical Research 79:141-  
633 148.
- 634 Harbison, S. T., L. J. McCoy, and T. F. C. Mackay. 2013. Genome-wide association  
635 study of sleep in *Drosophila melanogaster*. BMC Genomics 14.
- 636 He, B. Z., M. Z. Ludwig, D. A. Dickerson, L. Barse, B. Arun, B. J. Vilhjalmsón, S. Y.  
637 Park et al. 2014. Effect of genetic variation in a *Drosophila* model of  
638 diabetes-associated misfolded human proinsulin. Genetics 196:557-+.
- 639 Hine, E., S. Lachish, M. Higgie, and M. W. Blows. 2002. Positive genetic correlation  
640 between female preference and offspring fitness. Proceedings of the Royal  
641 Society B-Biological Sciences 269:2215-2219.

- 642 Huang, W., A. Massouras, Y. Inoue, J. Peiffer, M. Ramia, A. M. Tarone, L. Turlapati  
643 et al. 2014. Natural variation in genome architecture among 205  
644 *Drosophila melanogaster* Genetic Reference Panel lines. *Genome Research*  
645 24:1193-1208.
- 646 Hunter, C. M., W. Huang, T. F. C. Mackay, and N. D. Singh. 2016. The genetic  
647 architecture of natural variation in recombination rate in *Drosophila*  
648 *melanogaster*. *Plos Genetics* 12.
- 649 Jenkins, N. L., and A. A. Hoffmann. 1999. Limits to the southern border of  
650 *Drosophila serrata*: cold resistance, heritable variation, and trade-offs.  
651 *Evolution* 53:1823-1834.
- 652 Kellermann, V., B. van Heerwaarden, C. M. Sgro, and A. A. Hoffmann. 2009.  
653 Fundamental evolutionary limits in ecological traits drive *Drosophila*  
654 species distributions. *Science* 325:1244-1246.
- 655 King, E. G., G. Kislukhin, K. N. Walters, and A. D. Long. 2014. Using *Drosophila*  
656 *melanogaster* To identify chemotherapy toxicity genes. *Genetics* 198:31-+.
- 657 King, E. G., S. J. Macdonald, and A. D. Long. 2012. Properties and power of the  
658 *Drosophila* Synthetic Population Resource for the routine dissection of  
659 complex traits. *Genetics* 191:935-U522.
- 660 Kislukhin, G., E. G. King, K. N. Walters, S. J. Macdonald, and A. D. Long. 2013. The  
661 genetic architecture of methotrexate toxicity is similar in *Drosophila*  
662 *melanogaster* and humans. *G3-Genes Genomes Genetics* 3:1301-1310.
- 663 Kittles, R. A., W. D. Chen, R. K. Panguluri, C. Ahaghotu, A. Jackson, C. A.  
664 Adebamowo, R. Griffin et al. 2002. CYP3A4-V and prostate cancer in  
665 African Americans: causal or confounding association because of  
666 population stratification? *Human Genetics* 110:553-560.
- 667 Knowler, W. C., R. C. Williams, D. J. Pettitt, and A. G. Steinberg. 1988. Gm3;5,13,14  
668 and type 2 diabetes mellitus: an association in American Indians and  
669 genetic admixture. *American Journal of Human Genetics* 43:520-526.
- 670 Koch, E., M. Ristroph, and M. Kirkpatrick. 2013. Long range linkage  
671 disequilibrium across the human genome. *Plos One* 8.
- 672 Kruijer, W., M. P. Boer, M. Malosetti, P. J. Flood, B. Engel, R. Kooke, J. J. B.  
673 Keurentjes et al. 2015. Marker-based estimation of heritability in  
674 immortal populations. *Genetics* 199:379-393.
- 675 Labeur, C., R. Dallerac, and C. Wicker-Thomas. 2002. Involvement of *desat1* gene  
676 in the control of *Drosophila melanogaster* pheromone biosynthesis.  
677 *Genetica* 114:269-274.
- 678 Lack, J. B., C. M. Cardeno, M. W. Crepeau, W. Taylor, R. B. Corbett-Detig, K. A.  
679 Stevens, C. H. Langley et al. 2015. The *Drosophila* Genome Nexus: a  
680 population genomic resource of 623 *Drosophila melanogaster* genomes,  
681 including 197 from a single ancestral range population. *Genetics*  
682 199:1229-U1553.
- 683 Langley, C. H., K. Stevens, C. Cardeno, Y. C. G. Lee, D. R. Schrider, J. E. Pool, S. A.  
684 Langley et al. 2012. Genomic variation in natural populations of  
685 *Drosophila melanogaster*. *Genetics* 192:533-+.
- 686 Lemeunier, F., J. R. David, L. Tsacas, and M. Ashburner. 1986. The melanogaster  
687 species group. *The genetics and biology of Drosophila* 3:147-256.
- 688 Li, H. 2013. Aligning sequence reads, clone sequences and assembly contigs with  
689 BWA-MEM. arXiv:1303.3997v1 [q-bio.GN].



- 690 Lippert, C., J. Listgarten, Y. Liu, C. M. Kadie, R. I. Davidson, and D. Heckerman.  
691 2011. FaST linear mixed models for genome-wide association studies.  
692 Nature Methods 8:833-U894.
- 693 Long, A. D., R. F. Lyman, C. H. Langley, and T. F. C. Mackay. 1998. Two sites in the  
694 Delta gene region contribute to naturally occurring variation in bristle  
695 number in *Drosophila melanogaster*. Genetics 149:999-1017.
- 696 Mackay, T. F. C., S. Richards, E. A. Stone, A. Barbadilla, J. F. Ayroles, D. H. Zhu, S.  
697 Casillas et al. 2012. The *Drosophila melanogaster* Genetic Reference Panel.  
698 Nature 482:173-178.
- 699 Magiafoglou, A., M. E. Carew, and A. A. Hoffmann. 2002. Shifting clinal patterns  
700 and microsatellite variation in *Drosophila serrata* populations: a  
701 comparison of populations near the southern border of the species range.  
702 Journal of Evolutionary Biology 15:763-774.
- 703 Magwire, M. M., D. K. Fabian, H. Schweyen, C. Cao, B. Longdon, F. Bayer, and F. M.  
704 Jiggins. 2012. Genome-wide association studies reveal a simple genetic  
705 basis of resistance to naturally coevolving viruses in *Drosophila*  
706 *melanogaster*. Plos Genetics 8.
- 707 Marcillac, F., F. Bousquet, J. Alabouvette, F. Savarit, and J. F. Ferveur. 2005. A  
708 mutation with major effects on *Drosophila melanogaster* sex pheromones.  
709 Genetics 171:1617-1628.
- 710 Marriage, T. N., E. G. King, A. D. Long, and S. J. Macdonald. 2014. Fine-mapping  
711 nicotine resistance loci in *Drosophila* using a multiparent advanced  
712 generation inter-cross population. Genetics 198:45-+.
- 713 McGuigan, K., J. M. Collet, E. A. McGraw, Y. X. H. Ye, S. L. Allen, S. F. Chenoweth,  
714 and M. W. Blows. 2014. The nature and extent of mutational pleiotropy in  
715 gene expression of male *Drosophila serrata*. Genetics 196:911-+.
- 716 McGuigan, K., D. Petfield, and M. W. Blows. 2011. Reducing mutation load  
717 through sexual selection on males. Evolution 65:2816-2829.
- 718 McKenna, A., M. Hanna, E. Banks, A. Sivachenko, K. Cibulskis, A. Kernytsky, K.  
719 Garimella et al. 2010. The Genome Analysis Toolkit: a MapReduce  
720 framework for analyzing next-generation DNA sequencing data. Genome  
721 Research 20:1297-1303.
- 722 Nuzhdin, S. V., E. G. Pasyukova, C. L. Dilda, Z. B. Zeng, and T. F. C. Mackay. 1997.  
723 Sex-specific quantitative trait loci affecting longevity in *Drosophila*  
724 *melanogaster*. Proceedings of the National Academy of Sciences of the  
725 United States of America 94:9734-9739.
- 726 Pesch, Y. Y., D. Riedel, K. R. Patil, G. Loch, and M. Behr. 2016. Chitinases and  
727 imaginal disc growth factors organize the extracellular matrix formation  
728 at barrier tissues in insects. Scientific Reports 6.
- 729 Pool, J. E., R. B. Corbett-Detig, R. P. Sugino, K. A. Stevens, C. M. Cardeno, M. W.  
730 Crepeau, P. Duchon et al. 2012. Population genomics of Sub-Saharan  
731 *Drosophila melanogaster*: African Diversity and non-African admixture.  
732 Plos Genetics 8.
- 733 Remington, D. L., J. M. Thornsberry, Y. Matsuoka, L. M. Wilson, S. R. Whitt, J.  
734 Doeblay, S. Kresovich et al. 2001. Structure of linkage disequilibrium and  
735 phenotypic associations in the maize genome. Proceedings of the National  
736 Academy of Sciences of the United States of America 98:11479-11484.
- 737 Shorter, J., C. Couch, W. Huang, M. A. Carbone, J. Peiffer, R. R. H. Anholt, and T. F. C.  
738 Mackay. 2015. Genetic architecture of natural variation in *Drosophila*

- 739 *melanogaster* aggressive behavior. Proceedings of the National Academy  
740 of Sciences of the United States of America 112:E3555-E3563.
- 741 Stark, A., M. F. Lin, P. Kheradpour, J. S. Pedersen, L. Parts, J. W. Carlson, M. A.  
742 Crosby et al. 2007. Discovery of functional elements in 12 *Drosophila*  
743 genomes using evolutionary signatures. Nature 450:219-232.
- 744 Stocker, A. J., B. Foley, and A. Hoffmann. 2004. Inversion frequencies in  
745 *Drosophila serrata* along an eastern Australian transect. Genome 47:1144-  
746 1153.
- 747 Stocker, A. J., B. B. Rusuwa, M. J. Blacket, F. D. Frentiu, M. Sullivan, B. R. Foley, S.  
748 Beatson et al. 2012. Physical and linkage maps for *Drosophila serrata*, a  
749 model species for studies of clinal adaptation and sexual selection. G3-  
750 Genes Genomes Genetics 2:287-297.
- 751 Stone, E. A. 2012. Joint genotyping on the fly: identifying variation among a  
752 sequenced panel of inbred lines. Genome Research 22:966-974.
- 753 Sturgill, D., Y. Zhang, M. Parisi, and B. Oliver. 2007. Demasculinization of X  
754 chromosomes in the *Drosophila* genus. Nature 450:238-U233.
- 755 Tajima, F. 1989. Statistical method for testing the neutral mutation hypothesis by  
756 DNA polymorphism Genetics 123:585-595.
- 757 Treangen, T. J., and S. L. Salzberg. 2012. Repetitive DNA and next-generation  
758 sequencing: computational challenges and solutions. Nature Reviews  
759 Genetics 13:36-46.
- 760 Turner, J. R. 2009. Intestinal mucosal barrier function in health and disease.  
761 Nature Reviews Immunology 9:799-809.
- 762 Unckless, R. L., S. M. Rottschaefer, and B. P. Lazzaro. 2015. A genome-wide  
763 association study for nutritional indices in *Drosophila*. G3-Genes Genomes  
764 Genetics 5:417-425.
- 765 van Heerwaarden, B., V. Kellermann, M. Schiffer, M. Blacket, C. M. Sgro, and A. A.  
766 Hoffmann. 2009. Testing evolutionary hypotheses about species borders:  
767 patterns of genetic variation towards the southern borders of two  
768 rainforest *Drosophila* and a related habitat generalist. Proceedings of the  
769 Royal Society B-Biological Sciences 276:1517-1526.
- 770 Weber, A. L., G. F. Khan, M. M. Magwire, C. L. Tabor, T. F. C. Mackay, and R. R. H.  
771 Anholt. 2012. Genome-wide association analysis of oxidative stress  
772 resistance in *Drosophila melanogaster*. Plos One 7.
- 773 Wicker-Thomas, C., D. Garrido, G. Bontonou, L. Napal, N. Mazuras, B. Denis, T.  
774 Rubin et al. 2015. Flexible origin of hydrocarbon/pheromone precursors  
775 in *Drosophila melanogaster*. Journal of Lipid Research 56:2094-2101.
- 776 Yang, J. A., S. H. Lee, M. E. Goddard, and P. M. Visscher. 2011. GCTA: a tool for  
777 genome-wide complex trait analysis. American Journal of Human Genetics  
778 88:76-82.
- 779 Yassin, A. 2013. Phylogenetic classification of the Drosophilidae Rondani  
780 (Diptera): the role of morphology in the postgenomic era. Systematic  
781 Entomology 38:349-364.
- 782 Yassin, A., E. K. Delaney, A. J. Reddiex, T. D. Seher, H. Bastide, N. C. Appleton, J. B.  
783 Lack et al. 2016. The pdm3 locus is a hotspot for recurrent evolution of  
784 female-limited color dimorphism in *Drosophila*. Current Biology 26:2412-  
785 2422.



786 Zhang, Y., D. Sturgill, M. Parisi, S. Kumar, and B. Oliver. 2007. Constraint and  
787 turnover in sex-biased gene expression in the genus *Drosophila*. *Nature*  
788 450:233-U232.  
789 Zhou, X., and M. Stephens. 2012. Genome-wide efficient mixed-model analysis for  
790 association studies. *Nature Genetics* 44:821-U136.  
791  
792  
793  
794  
795  
796  
797  
798  
799  
800  
801  
802  
803  
804  
805  
806  
807  
808  
809  
810  
811  
812  
813  
814  
815  
816  
817  
818  
819  
820

821 **Figures and tables:**

822

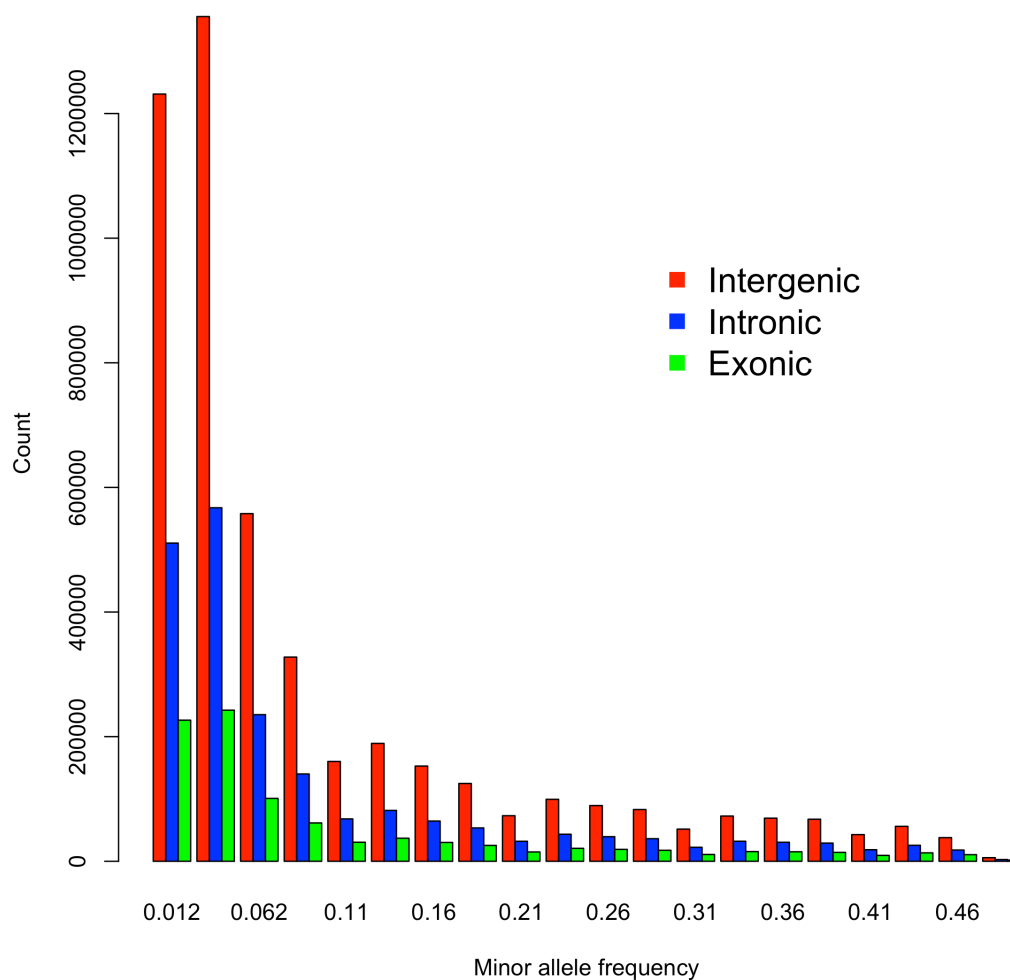

823

824 Figure 1: The allele frequency spectrum of SNPs annotated as intergenic (red),  
825 intronic (blue), or exonic (green). Singletons (MAF = 0.009) are not shown. We  
826 identified 3,748,429 singletons from intergenic regions, 1,535,651 from intronic  
827 regions, and 754,075 from exonic regions of the genome.

828

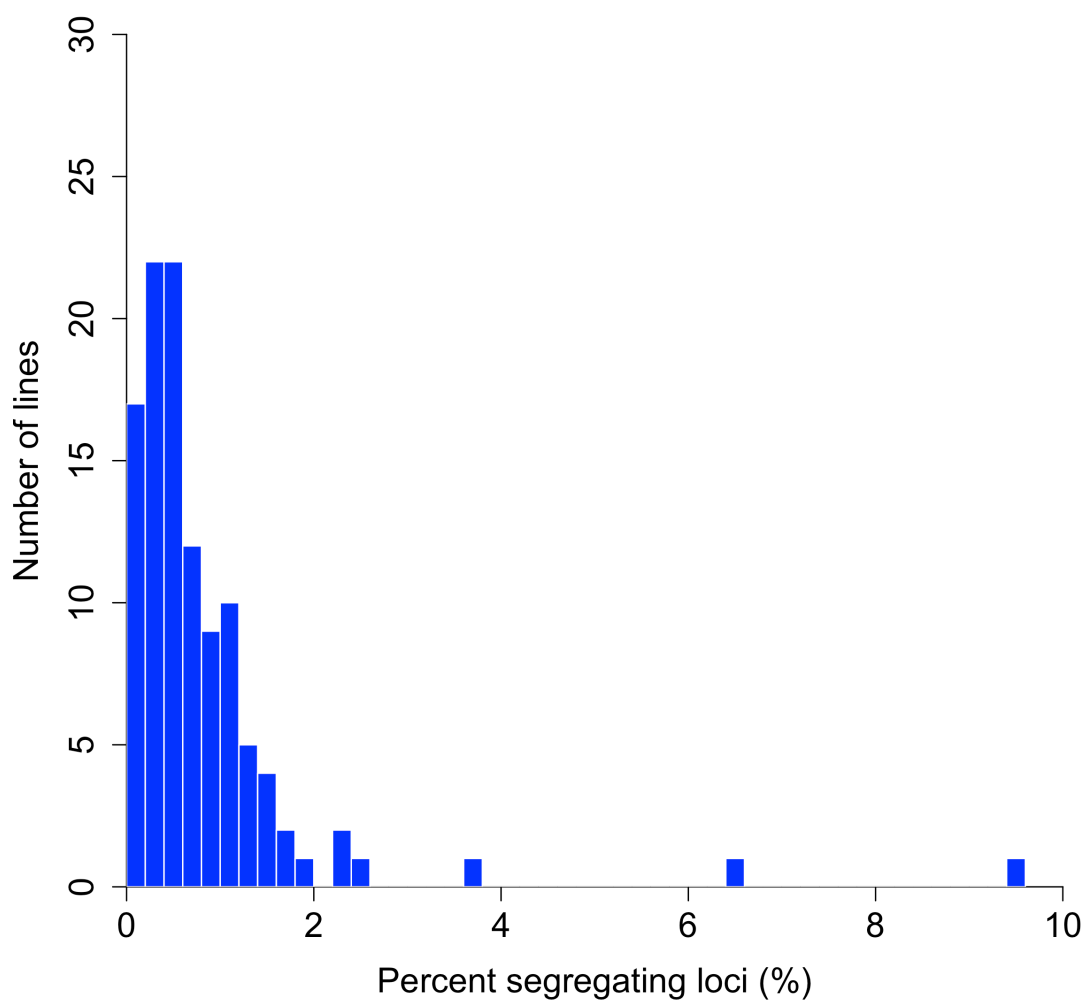

829

830 Figure 2: The distribution of residual heterozygosity as measured by the  
831 percentage of total genotyped biallelic SNPs (loci) that were called as  
832 heterozygous within each inbred line by the Joint Genotyper of Inbred Lines  
833 (JGIL).

834

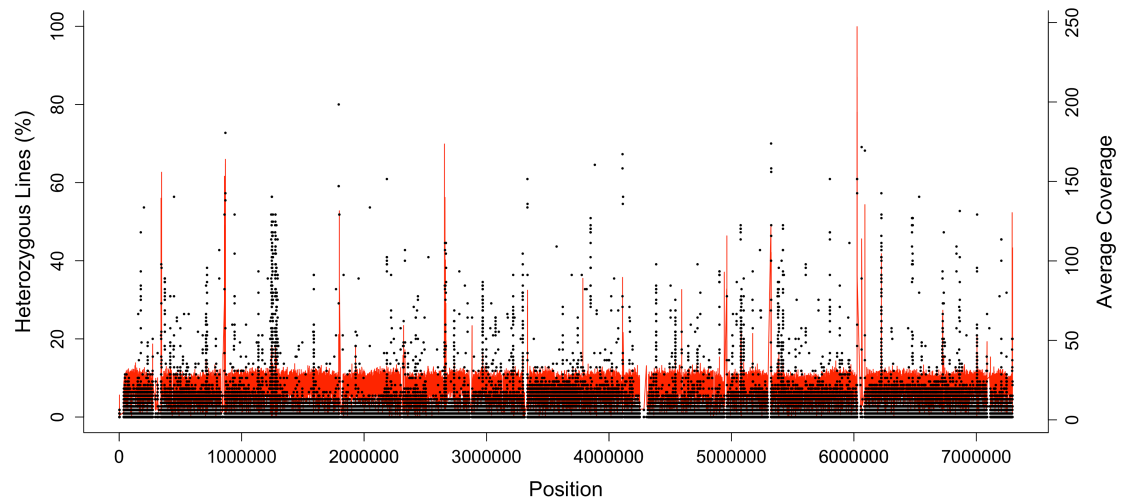

835

836 Figure 3: The proportion of lines that are heterozygous at every site along the  
837 largest scaffold (scf7180000003208) of the reference genome (black) overlaid  
838 with the average read depth at each site shown in red. Peaks in red lines  
839 represent potential gene duplications that have collapsed to the same region  
840 during assembly.

841

842

843

844

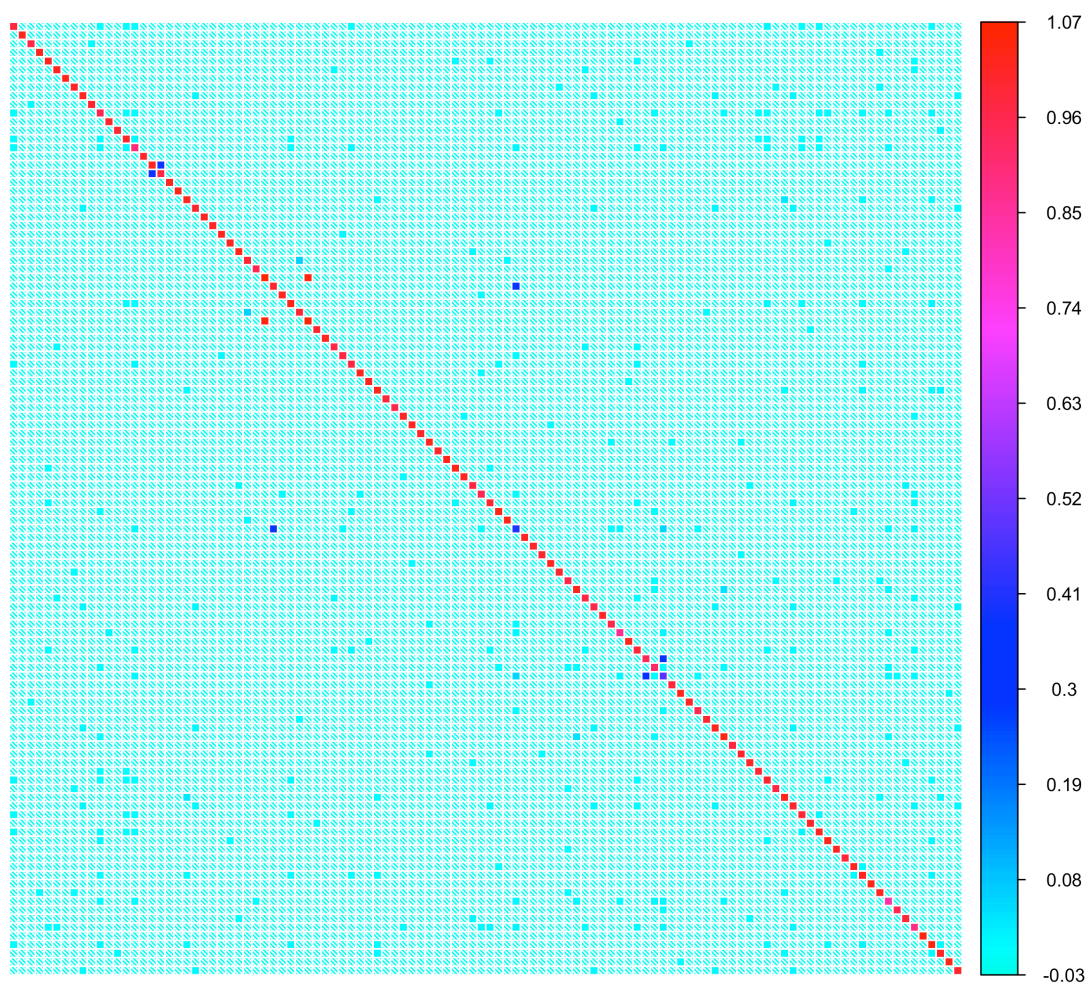

845 Figure 4: Heat-map of the genomic relatedness matrix for each pair of the 110  
846 inbred DsGRP lines. Each coloured squared is an estimate of genomic  
847 relatedness between a pair of inbred lines estimated by GCTA (Yang et al. 2011).  
848 The shade of colour represents the degree of relatedness, with light blue showing  
849 low levels of relatedness and red high levels of relatedness.  
850

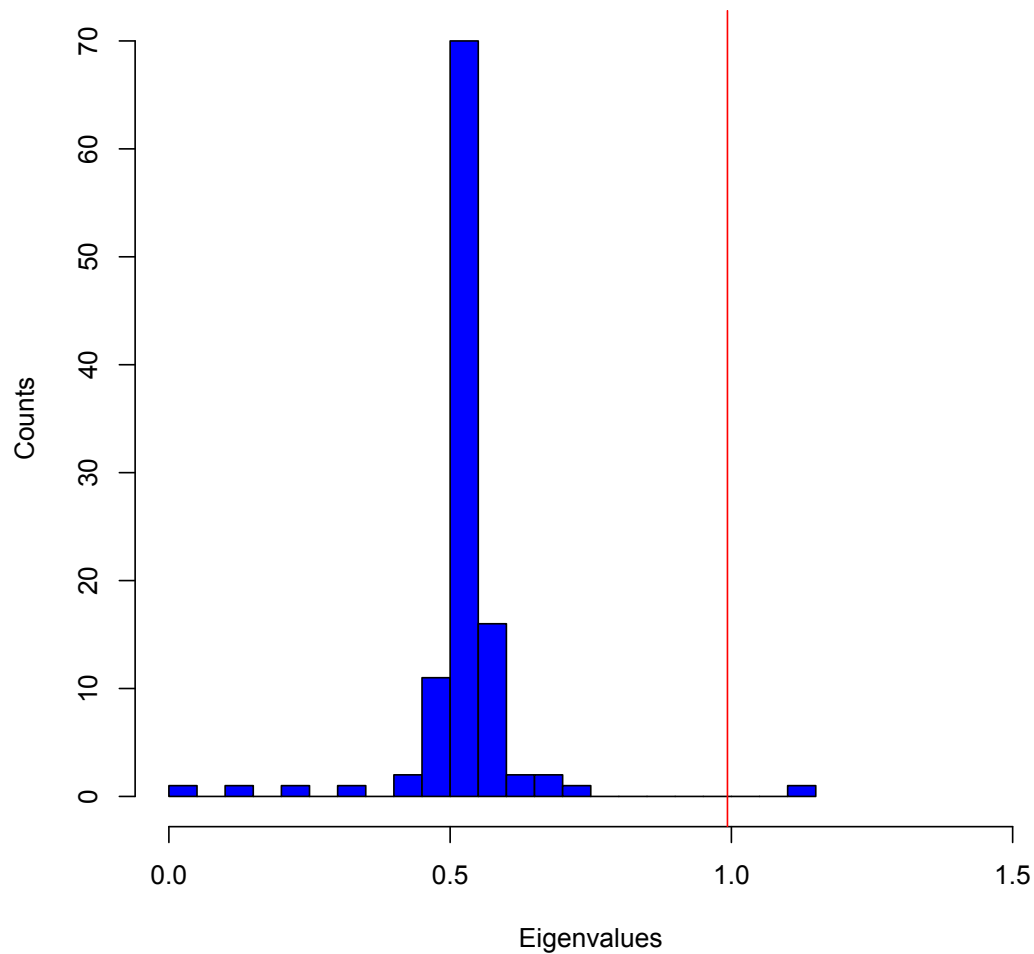

851

852 Figure 5: Distribution of eigenvalues from an eigendecomposition of the  
853 genomic relatedness matrix for all 110 lines excluding one large eigenvalue  
854 where  $\lambda = 20.08$ . Eigendecomposition of the genomic relatedness matrix,  $\mathbf{X}$ ,  
855 which was scaled by equation 2.8 in Bryc et al. (2013) using values of  $N =$   
856  $3,709,328$  and  $M = 110$ . Here,  $N$  corresponds to the number of SNPs used to  
857 estimate  $\mathbf{X}$  and  $M$  is the number of lines. Only SNPs with without missing data  
858 were used for this analysis. The red vertical line corresponds to the significance  
859 threshold,  $t$ , for declaring an eigenvalue larger than that expected for a random  
860 relatedness matrix.  $t = (1 + F) / 2$  and corresponds to a value of  $0.993$  with our  
861 expected inbreeding coefficient ( $F$ ) of  $0.986$  after 20 generations of full-sib  
862 mating. The two largest eigenvalues were significant,  $\lambda_1 = 20.08$  (not plotted)  
863 and  $\lambda_2 = 1.12$ .

864

865

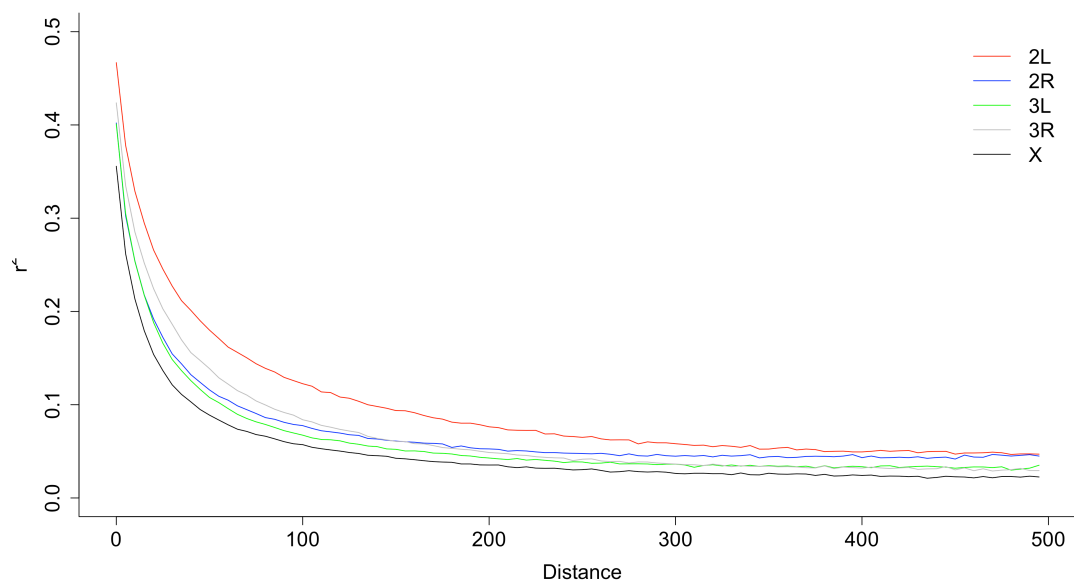

866

867 Figure 6: Decay of linkage disequilibrium ( $r^2$ ) between SNPs with genomic  
868 distance (bp) in the DsGRP. Values are averaged across each chromosome.

869



870

871

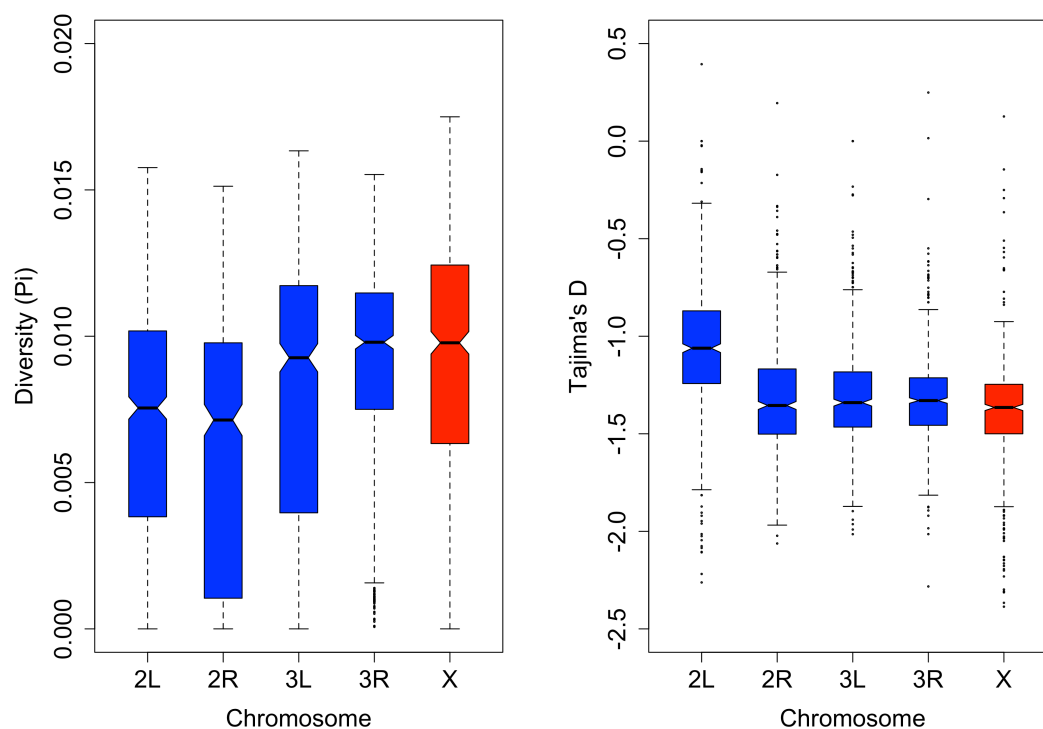

872

873 Figure 7: Boxplots of nucleotide diversity and Tajima's D by chromosome arm.

874 Shown are the estimates from 50 kilobase non-overlapping sliding windows with

875 the breakdown of the number of windows per chromosome as follows: 2L = 691,

876 2R = 664, 3L = 641, 3R = 741, and X = 628.

877

878

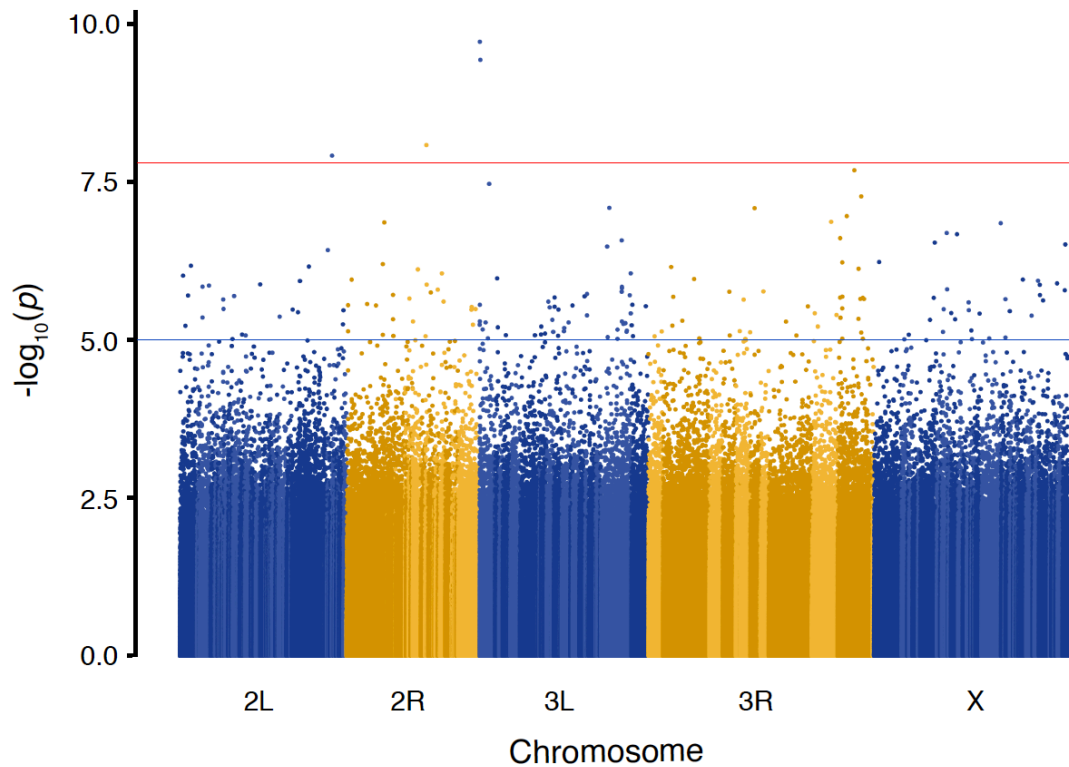

879

880

881 Figure 8: Genome-wide association for 2-Me-C<sub>28</sub> expression in female *Drosophila*  
882 *serrata*. Red line indicates Bonferroni threshold corresponding to  $P = 0.05$  and  
883 the blue indicates an arbitrary significance threshold of  $P = 10^{-5}$ . A total of  
884 3,318,503 biallelic SNPs were analyzed with a minimum minor allele frequency  
885 of 0.5. Alternating colour shading within chromosomes indicates different  
886 contigs in the *D. serrata* genome assembly. Contig order has not yet been  
887 established for the genome.

888
